# Thermotaxis of mammalian sperm

Wanglong Xiao<sup>1,†</sup>, Mengdi Yu<sup>1,†</sup>, Yan Yuan<sup>1</sup>,  
Xingzhu Liu<sup>2</sup>, and Ying Chen<sup>1,3,\*</sup> 

<sup>1</sup>Institute of Life Science and School of Life Science, Nanchang University, Nanchang, Jiangxi, P. R. China <sup>2</sup>Queen Mary College, Nanchang University, Nanchang, Jiangxi, P. R. China <sup>3</sup>Key Laboratory of Reproductive Physiology and Pathology in Jiangxi Province, Nanchang, Jiangxi, P. R. China

\*Correspondence address. Institute of Life Science and School of Life Science, Nanchang University, No. 999 Xuefu Avenue, Honggutan District, Nanchang, Jiangxi Province 330031, P. R. China. E-mail: chenying26@ncu.edu.cn  <https://orcid.org/0000-0002-1323-4733>

Submitted on May 02, 2022; resubmitted on July 06, 2022; editorial decision on July 18, 2022

**ABSTRACT:** Sperm are guided through the female reproductive tract. A temperature difference of about 2°C exists between the storage site and fertilization site of the mammalian oviduct, leading to the hypothesis that sperm can sense and swim towards the oocyte along a rising temperature gradient, known as thermotaxis. Research over the past two decades has reported that sperm feature a sophisticated thermal detection system to detect and track ambient temperature gradients. More recently, thermotaxis is expected to be added to the microfluidic isolation method based on sperm tactic responses for sperm selection. In this article, mammalian sperm thermotaxis is discussed, explaining the underlying behavioural mechanisms and molecular basis, according to the latest research. Finally, this article explores the possible application of sperm thermotaxis in ART.

**Key words:** spermatozoa / thermotaxis / assisted reproductive technology / opsin / thermoTRP

## Introduction

Thermotaxis, or temperature-oriented cell motility, is a universal phenomenon in biology. Lower organisms such as bacteria (Paulick *et al.*, 2017), nematodes (Kimata *et al.*, 2012), parasites (Mok *et al.*, 1986) and *Drosophilas* (Ni *et al.*, 2013) mostly exhibit a thermotactic response to suitable temperatures. In recent years, mammalian spermatozoa have also been found to have the ability to swim along positive temperature gradients *in vitro*. Together with the temperature differences measured in the oviducts of pigs and rabbits (Hunter and Nichol, 1986; Bahat *et al.*, 2003), Bahat *et al.* (2003) innovatively proposed that thermotaxis may serve as a navigation mechanism to guide the transport of mammalian sperm from the storage site (isthmus) to the warmer fertilization site (ampulla).

Resulting from research efforts over the past two decades, scientists have described multiple aspects of mammalian sperm thermotaxis. The temperature difference within the female reproductive tract (FRT) and its underlying mechanism have been explored. Temperature gradient detection and tracking methods for sperm have been described. Furthermore, the temperature range for thermotactic behaviour and the optimal temperature gradient has been researched, focusing on the properties of the sperm temperature sensors. More recently, the feasibility of applying thermotaxis to sperm selection in assisted reproduction has been explored. This article addresses these topics by synthesizing the currently available knowledge, focusing on the characteristics of the recently discovered temperature sensors.

## Thermotaxis at a glance

A temperature difference of about 1°C was initially measured across the oviducts of pigs and rabbits through thermistor probes (Hunter and Nichol, 1986; Bahat *et al.*, 2003). This difference is ovulation-dependent, with the temperature difference doubling to 2°C at ovulation (Bahat *et al.*, 2005). The enlarged temperature difference reflects the vascular and lymphatic bed as well as muscle tissue activity. The temperature difference is generated by a temperature drop at the storage site. Theoretically, three mechanisms are involved: (i) an endothermic effect through acid mucus glycoprotein hydration; (ii) a counter-current heat exchange in the ovarian vein at the storage site; and (iii) an ovulation-dependent change in blood supply (Bahat *et al.*, 2005; Eisenbach and Giojalas, 2006). For obvious reasons, data on intratubal temperature differences in humans are not yet available. However, human sperm thermotaxis has been the focus of extensive research (Bahat and Eisenbach, 2010; Bahat *et al.*, 2012; Li *et al.*, 2014; De Toni *et al.*, 2016), along with that of boar (Martin-Hidalgo *et al.*, 2018; Rodriguez-Gil, 2019), rabbit (Bahat *et al.*, 2003), mouse (Perez-Cerezales *et al.*, 2015a; Hamano *et al.*, 2016; Ko *et al.*, 2018), bull (Mondal *et al.*, 2017) and stallion (Ruiz-Díaz *et al.*, 2020) sperm, which have been demonstrated to accumulate towards higher temperatures in various *in vitro* systems. Thus, thermotaxis has been recognized as a general property of mammalian sperm. Furthermore, as in the case of chemotaxis, only capacitated sperm are thermotactically responsive, accounting for about 5–10% of the total (Bahat *et al.*,

<sup>†</sup>Wanglong Xiao, Mengdi Yu should be regarded as joint first authors.

2003; Li et al., 2014). Human sperm can respond to temperature gradients as low as  $0.014^{\circ}\text{C mm}^{-1}$  over a wide range ( $29\text{--}41^{\circ}\text{C}$ ) (Bahat et al., 2012). Such a wide effective temperature range and excellent sensitivity suggest that sperm cells have a thermal detection system comprising many sensors. The sensors detect different temperature ranges and overlap to some extent. The optimal temperature gradient for mouse sperm was determined to be  $0.154^{\circ}\text{C mm}^{-1}$  in a microfluidic chip when the temperature difference was  $2^{\circ}\text{C}$ , whereas the optimal temperature gradient for human sperm was further narrowed to about  $0.07\text{--}0.15^{\circ}\text{C mm}^{-1}$  (Yan et al., 2021).

Thermotaxis has been proposed as one of the physiological mammalian sperm navigation mechanisms (Bahat et al., 2003; Perez-Cerezales et al., 2015b) (Fig. 1A). Sperm movement from the isthmus to the ampulla towards the oocyte covers a considerable distance relative to its body length, so appropriate guidance is required to locate the oocyte (Suarez and Pacey, 2006). During this adventure, various biochemical factors, such as compounds (Brenker et al., 2012) and cell interactions (Suarez, 2016; Li et al., 2022) and physical information, such as temperature (Bahat et al., 2003), fluid (Kantsler et al., 2014; Zaferani et al., 2021a) and the tube wall (Zaferani et al., 2021b; Li et al., 2022), in the FRT provide directional cues for sperm guidance. Chemoattractants in the follicular fluid, such as progesterone secreted by cumulus cells, may facilitate sperm mobilization towards the oocyte, a process known as chemotaxis (Sun et al., 2005; Teves et al., 2006). However, due to the perturbations in oviductal peristalsis and fluid flow, a gradient of chemoattractants may only be effective when the sperm approaches the oocyte (Cohen-Dayag et al., 1994; Hino and Yanagimachi, 2019). On the other hand, thermotaxis can function over longer distances due to the

stability of temperature gradients and the sperm's sensitivity to minimal temperature differences (Bahat et al., 2003). In addition, sperm also exhibit counter-current swimming, which seems to be a completely passive fluid-dependent process called rheotaxis (Miki and Clapham, 2013; Schiffer et al., 2020). A popular view is that long-range temperature gradients and short-range chemoattractant gradients are sequentially involved in sperm migration guidance, with passive rheotaxis playing a decisive role (Bahat and Eisenbach, 2006; Miki and Clapham, 2013).

## Behavioural mechanisms

Some groups have raised the possibility that thermotaxis could be a consequence of rheological behaviour induced by thermal convection (Miki and Clapham, 2013) or metabolic changes promoted by elevated temperature (Chan et al., 1998; Miller et al., 2001; Marin-Briggiler et al., 2002). However, these possibilities were demonstrated to be incorrect (Bahat et al., 2012; Perez-Cerezales et al., 2015b). To explore thermotaxis in the FRT environment, the underlying behavioural mechanisms need to be revealed, confirming whether temperature gradients confer the ability to change the direction of sperm movement (Perez-Cerezales et al., 2015b). In chemotaxis, the capacitated sperm reorient in the chemoattractant gradient by inhibiting their hyperactivation events (an asymmetric, high-amplitude flagellar beating pattern) (Armon and Eisenbach, 2011), while in rheotaxis, the sperm responds to shear flow mostly by rotating along its longitudinal axis (Zaferani et al., 2021a). However, little is known about how sperm responds to temperature differences, and the current research suggests that

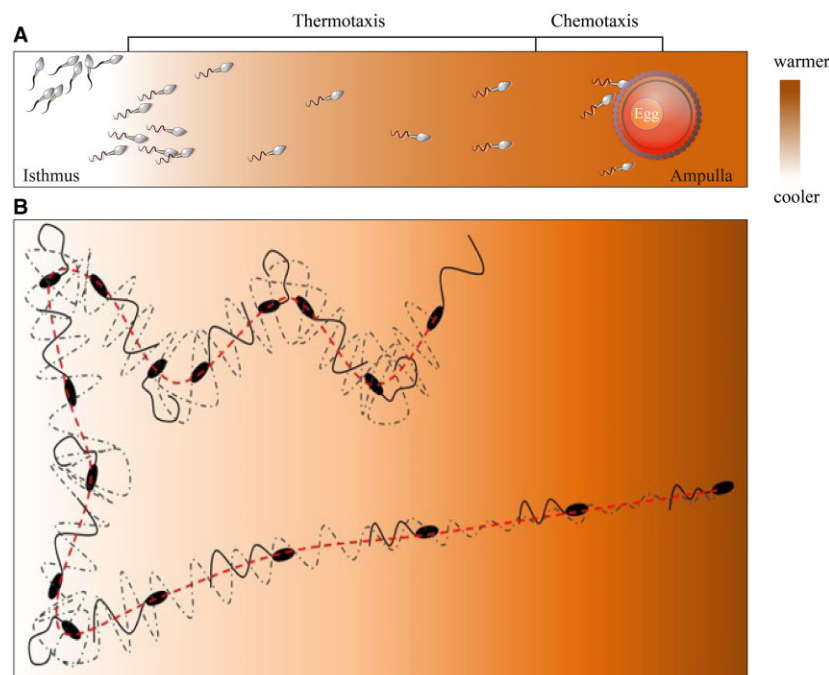

**Figure 1. Thermotaxis navigation in mammalian sperm.** (A) Sperm use thermotaxis to swim from the isthmus to the warmer ampulla, and chemotaxis plays a role near the oocyte. (B) A behavioural model of thermotaxis. The black dashed line represents the trajectory of the sperm head, and the red dashed line represents its average path. Part B is reprinted with permission from Boryshpolets et al. (2015).

hyperactivation is involved. Boryshpolets *et al.* (2015) observed that rapid positive temperature changes (from 31°C to 37°C) affect human sperm behaviour in two ways: warming increases the linear velocity and cooling increases the flagellar wave amplitude. The latter is essentially an increase in hyperactivation and turning frequency. In other words, the speed increases while the frequency of hyperactivation and turn decreases along the positive temperature gradient. Furthermore, similar to bacterial behaviour (Macnab and Koshland, 1972), one possible motility model for swimming sperm is that they turn and hyperactivate more frequently at cooler temperatures, whereas their linear velocity intensifies at higher temperatures (Boryshpolets *et al.*, 2015). This effect accumulates and persists, eventually resulting in linear swimming along a positive temperature gradient (Fig. 1B). The linear sperm movement along a vertical isotherm was clearly observed in a microfluidic chip, confirming that the change in velocity and direction is a result of temperature differences (Yan *et al.*, 2021). It is worth mentioning that mammalian sperm chemotaxis also involves hyperactivation (Armon and Eisenbach, 2011). Considering that both thermotaxis and chemotaxis are activated during capacitation, inhibition of hyperactivation by temperature and chemoattractant gradients may be a general directional means for capacitated sperm.

## Molecular basis

Since its introduction in 2003, the molecular basis for thermotaxis and its remarkable temperature sensitivity has been a subject of research (Bahat *et al.*, 2003). It is well-known that sperm navigation in the FRT is regulated by a series of calcium-dependent events, including motility hyperactivation, capacitation, acrosome reaction and chemotaxis (Jimenez-Gonzalez *et al.*, 2006). Temperature information may likewise be coded into changes in intracellular  $\text{Ca}^{2+}$  concentration ( $[\text{Ca}^{2+}]_i$ ), which in turn activates the sAC/cAMP/PKA pathway to phosphorylate proteins. This is crucial for sperm motility (Stock *et al.*, 2013; Wachten *et al.*, 2017). Temperature-induced stimulation of sperm motility requires calcium signals to be sent to the flagellum (Martin-Hidalgo *et al.*, 2018). Therefore, calcium signalling was considered in the molecular mechanisms of sperm thermotaxis. Previous studies of human sperm thermotaxis had identified an obvious calcium pathway, in that temperature changes were described to activate phospholipase C (PLC), leading to hydrolysis of phosphatidylinositol 4,5-bisphosphate (PIP2) to diacylglycerol (DAG) and inositol trisphosphate (IP3). IP3 then binds to the inositol 1,4,5-trisphosphate receptor (IP3R) on the calcium pool to release  $\text{Ca}^{2+}$ , which regulates the flagellar beating waveform to control the swimming path (Bahat and Eisenbach, 2010). Calcium signalling has thus been postulated as the molecular basis of sperm thermotaxis. Based on the current expression studies, combined with applied electrophysiological, genetic and pharmacological approaches, it is possible to design a profiling model of sperm thermotaxis, which is that thermosensory signalling cascades initiated by temperature sensors control thermotactic behaviour in a calcium concentration-regulated manner.

## Temperature sensors

Two families of membrane proteins are known to be responsible for sensory transduction in eukaryotes: G protein-coupled receptors (GPCRs) and ion channels (Cygankiewicz *et al.*, 2014; Dalesio *et al.*,

2018). Respectively, current studies are investigating the possibility of opsins and thermosensitive transient receptor potential (thermoTRP) channels as thermotaxis sensors (Fig. 2).

### ThermoTRP

ThermoTRP is a highly temperature-sensitive subset of the non-selective cation channel TRP superfamily, responsible for ambient temperature detection and maintenance of body thermal homeostasis (Patapoutian *et al.*, 2003; Dhaka *et al.*, 2006; Vandewauw *et al.*, 2018). Once regarded as the main, or even the only, molecular thermometer of an organism, thermoTRP possesses temperature-sensing properties sufficient to cover the physiological range (Cao *et al.*, 2013; Kashio, 2021). Heat-activated transient receptor potential vanilloid (TRPV)1–4, cold-activated transient receptor potential cation channel subfamily M member 8 (TRPM8) and transient receptor potential cation channel subfamily A member 1 (TRPA1) are classified as conventional thermoTRPs. Several others, such as TRPM2–5 and transient receptor potential channel 5 (TRPC5), also sense temperature (Vay *et al.*, 2012). Thermal stimulation induces gating after global conformational changes of thermoTRPs to regulate sperm function with electrical signals (Chowdhury *et al.*, 2014). Among them, TRPV1 (Maccarrone *et al.*, 2005; Francavilla *et al.*, 2009; Gervasi *et al.*, 2011), TRPV4 (Hamano *et al.*, 2016; Kumar *et al.*, 2016; Mundt *et al.*, 2018) and TRPM8 (De Blas *et al.*, 2009; Martínez-López *et al.*, 2011; Majhi *et al.*, 2015) are endogenously expressed in vertebrate sperm cells and are currently strong candidates for sperm temperature receptors. TRPV1 and TRPM8 protect germ cells from heat stress and cold shock, respectively, and TRPV4 is a necessary membrane depolarization channel for sperm hyperactivation (Mizrak and van Dissel-Emiliani, 2008; Borowiec *et al.*, 2016; Mundt *et al.*, 2018). The remaining thermoTRPs, although also present in sperm, have not been tested in thermotropic processes (Castellano *et al.*, 2003; Majhi *et al.*, 2020). In 2006, Hamano *et al.* (2016) proposed that TRPV4 is involved in sperm thermotaxis, as the proportion of spermatozoa in spermatozoa with *Trpv4* knockout and following ruthenium red (TRPV antagonist) treatment was significantly reduced. In the same year, De Toni *et al.* (2016) observed that migration towards a temperature gradient enabled the selection of sperm cells characterized by high TRPV1 expression, whereas pre-incubation with a TRPV1 antagonist inhibited thermotaxis in a manner that severely reduced calcium concentrations. Given the complex regulation of TRPV1/TRPV4 in other aspects of sperm function such as cell migration, capacitation and acrosome responses, caution is still required in identifying TRPV1/TRPV4 as thermotaxis temperature sensors (Waning *et al.*, 2007; Xiao and Chen, 2022). Interestingly, there is now a consensus that thermotaxis is not regulated by a single receptor, as neither antagonism nor knockout of either putative sensor completely eliminates sperm thermotaxis.

### Opsins

Another group proposed as temperature sensors for sperm thermotaxis are the GPCR opsins, inspired by the surprising breakthrough of rhodopsin in temperature discrimination in *Drosophila* (Minke and Peters, 2011). The dogma in the past held that opsins were restricted to light-exposed tissues (eyes and skin), however, expression of opsins was detected in other organs and exhibited light-independent effects (Leung and Montell, 2017; Moraes *et al.*, 2021). The ability of *Drosophila* to select the optimum temperature (18°C) within the comfort temperature range (18–

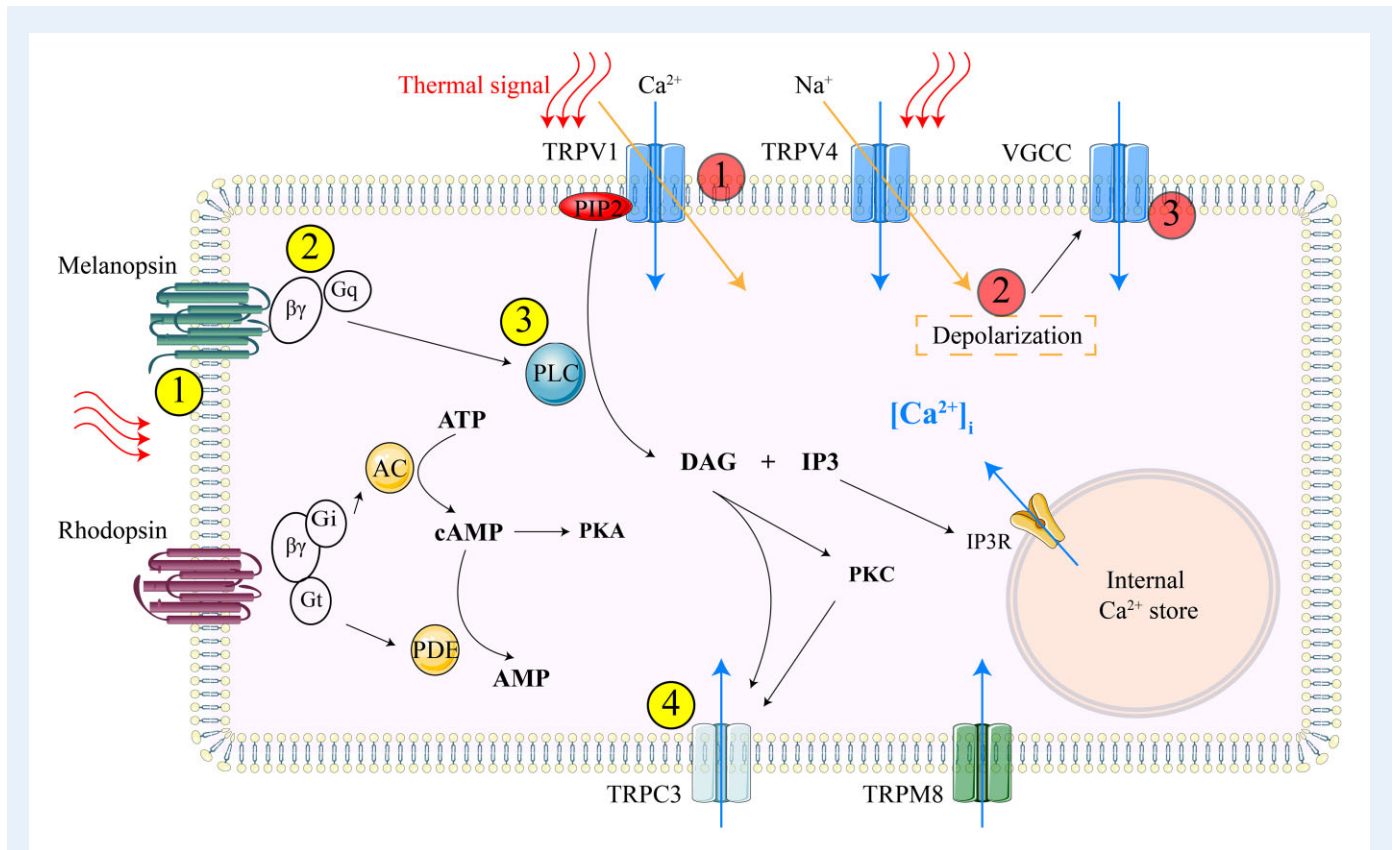

**Figure 2. A molecular model of mammalian sperm thermotaxis.** ThermoTRPs and opsins initiate a PLC signalling cascade that controls thermotaxis in a calcium-regulated manner. Blue and yellow arrows indicate sodium and calcium currents, and red arrows indicate thermal signals. The red numbers indicate thermoTRPs thermotransduction steps: (1) TRPV1/TRPV4 are activated by thermal signal or hydrolysis of PIP<sub>2</sub>; (2) membrane depolarization; and (3) calcium channel opening. Yellow numbers indicate the opsins thermotransduction steps: (1) opsins receive thermal signal; (2) G protein activation; (3) PLC activation; (4) downstream TRP channels opening. See text for details. thermoTRPs, thermosensitive transient receptor potential; PLC, phospholipase C; VGCC, voltage-gated calcium channel; IP<sub>3</sub>R, inositol 1,4,5-trisphosphate receptor; [Ca<sup>2+</sup>]<sub>i</sub>, intracellular Ca<sup>2+</sup> concentration; PIP<sub>2</sub>, phosphatidylinositol 4,5-bisphosphate; DAG, diacylglycerol; PDE, phosphodiesterase; PKA, protein kinase A; PKC, protein kinase C.

24°C), and the change in thermal preference exhibited by third instar larvae, result from the activation of TRP channels by an enzymatic cascade initiated by rhodopsin (Shen et al., 2011; Sokabe et al., 2016). Rhodopsin and various opsins (melanopsin, encephalopsin and neuropsin) were recently discovered in mammalian spermatozoa by qRT-PCR, western blotting and immunocytochemistry (Pérez-Cerezales et al., 2015a). Rhodopsin is mainly located in the head of human sperm and the tail of mouse sperm. To investigate whether opsins act as temperature sensors for sperm, Pérez-Cerezales et al. (2015a) first demonstrated the involvement of GPCRs in thermotaxis, with a temperature gradient-dependent accumulation in sperm being inhibited by ml19k, a G protein inhibitor. Moreover, the use of hydroxylamine, a nucleophile that disrupts opsin function, resulted in an inhibition of thermotaxis. Another study observed enrichment of rhodopsin in a subset of spermatozoa selected by thermotaxis, supporting opsins as markers of thermotaxis (Pérez-Cerezales et al., 2018). It was recently recorded that rhodopsin and melanopsin co-localize in mammalian sperm cells (Roy et al., 2020). The thermotactic activity of sperm in mice with knockout of either rhodopsin or melanopsin was reduced by 70% and 50%, respectively (Pérez-Cerezales et al., 2015a; Roy et al., 2020). This finding is more pronounced than the expected effect of knocking out a single protein. A plausible explanation

is that, as in the retina, opsins are organized in sperm cells in paracrystalline arrays of dimers (Fotiadis et al., 2003; Pérez-Cerezales et al., 2015a). This structure is so delicately adapted to construct thermal detection of sperm that removal of individual proteins can lead to disruption of the array system. Moreover, the cooperation of the two opsins is recapitulated in *Drosophila*, and *Drosophila* expressing melanopsin can reverse the Rh1 (rhodopsin) knockout defect in thermal sensory recognition (Shen et al., 2011). However, rhodopsin and melanopsin appear to be involved in two distinct thermotaxis mechanisms, corresponding to the transduction/cyclic nucleotides and PLC pathways, respectively (see next subsection) (Roy et al., 2020). The study demonstrates that the extraordinary thermal recognition of sperm relies on multiple opsins, potentially initiating G protein-coupled signalling cascades similar to that on visual cells. These signalling cascades have an amplifying effect, granting sperm cells the ability to sense tiny temperature differences.

### Thermosensory signalling cascades

Sperm possess far sharper temperature sensations than *Drosophila*, responding to very small differences (<0.0006°C) between the head and tail of the cell (Bahat et al., 2012). This ability, in addition to the



requirement that temperature sensors have a large molecular composition, means that thermosensory signalling cascades may have to amplify small temperature differences to the optimum. Such cascades are evident in vision as well as in the thermotaxis of invertebrates, and mammalian sperm may be no exception (Fu and Yau, 2007; Kwon et al., 2008).

In one case, PLC is activated by opsin-coupled G proteins, and TRPs act as downstream transduction channels. In melanopsin knock-out mouse sperm, application of the general phosphodiesterase (PDE) inhibitors caffeine and 3-isobutyl-1-methylxanthine (IBMX) and the specific PDE5/6 inhibitor sildenafil both partially inhibited thermotaxis (Perez-Cerezales et al., 2015a; Roy et al., 2020). It has also been indicated that rhodopsin expression leads to changes in the intracellular cyclic nucleotide content of sperm through the  $G_q$ /PDE pathway, with effects that closely match the behavioural responses of vertebrate rods and cones to light (Fu and Yau, 2007). Notably, rhodopsin in *Drosophila* senses temperature differences via  $G_q$ /PLC rather than  $G_r$ /PDE, but rhodopsin in sperm does not appear to be involved in the PLC cascade (Roy et al., 2020). Instead, mammalian sperm melanopsins are functionally similar to invertebrate (*Drosophila*) opsins, activating downstream TRP channels through a pathway coupled to  $G_q$ /PLC and hydrolysis of PIP2 (Roy et al., 2020). These TRPs are most likely TRPC family members represented by TRPC3, as both the TRPC inhibitor SKF96365 and the TRPC3 inhibitor Pyr3 reduce the amount of sperm accumulating in the warmer compartment (Panda et al., 2005; Perez-Cerezales et al., 2015a). In addition, opsin cascade downstream signalling appear to modulate many important events associated with thermotaxis, including the control of thermoTRP thermosensitivity (Kaneko and Szallasi, 2014), capacitation (Li et al., 2021) and hyperactivation (Fujinoki, 2013), through DAG/protein kinase C (PKC) and cAMP/protein kinase A (PKA) pathway-dependent phosphorylation rather than dephosphorylation.

Alternatively, thermoTRP acts as the primary temperature sensor, mediated by PLC activation and the triggering of action potential. Thermal activation of thermoTRP leads to membrane depolarization and  $Ca^{2+}$  influx. It has been demonstrated in human sperm that temperature-sensitive TRPV4 mediates  $Na^+$  influx to induce sperm membrane depolarization when exposed to the warm FRT, which is necessary to facilitate gating of ion channels (Mundt et al., 2018). TRPV1 also acts as a depolarizing channel and opens voltage-gated calcium channels (VGCCs), because activation of TRPV1 causes a transient rise in sperm  $[Ca^{2+}]_i$ , an effect that is severely inhibited in the absence of extracellular sodium or the presence of the VGCC inhibitor verapamil (Bernabo et al., 2010; De Toni et al., 2016). Furthermore, a temperature-dependent  $[Ca^{2+}]_i$  increase mediated by TRPM8 in the 21–23°C range was directly detected in sperm (De Blas et al., 2009). The above results imply that the release of internal  $Ca^{2+}$  stores and/or subsequent opening of new calcium channels (VGCCs or store-operated calcium channels (SOCCs)) are the main consequences of thermoTRP sensing of thermal stimuli. Indeed, the extracellular calcium chelator EGTA and the intracellular calcium chelator BAPTA abolish thermotaxis of bull sperm (Mondal et al., 2017). Coincidentally, the most likely additional candidate calcium channel is the non-temperature-sensitive TRPC3. TRPC3 is not only a SOCC but also activated by DAG and  $Ca^{2+}$  downstream of PLC (Wang et al., 2020). There may be sequential activation events between opsins and thermoTRPs, and the complex crosstalk between the two systems on thermotaxis remains to be further investigated.

## Thermotaxis-driven microfluidics in ART

Sperm entering the FRT are subjected to rigorous selection, allowing only the best candidate from the millions of ejaculated gametes to complete fertilization (Suarez and Pacey, 2006). However, the harsh elimination mechanisms lead to infertility issues in men with asthenozoospermia. Infertility is estimated to affect nearly 10% of men worldwide, with abnormal semen parameters being the leading cause of male infertility (Barratt et al., 2017). Embryologists use ART to select the fertile and healthy sperm subpopulations to overcome the barriers of FRT and fertilize an oocyte. IVF and IUI retain the cumulus and zona pellucida selection, while ICSI directly bypasses all natural selection processes. Therefore, to reduce the genetic risk of paternal genomic defects, sperm selection from semen samples is critical for ART. The microfluidic lab-on-a-chip device developed in the past fifteen years can establish a laminar flow field that strictly simulates sperm migration in the FRT and avoids the generation of reactive oxygen species and DNA fragmentation in the centrifugation step of traditional sorting techniques (Nosrati et al., 2017).

Applying thermotaxis to ART is a relatively new idea that is recently being tested on microfluidic chips (Li et al., 2014; Pérez-Cerezales et al., 2018). The basic principle of thermotaxis-driven microfluidics is to place sperm in a microchannel that allows free swimming and to use a microheater to apply a lateral temperature gradient in the channel, thereby selecting and trapping thermotactic sperm in specific branches (Li et al., 2014; Karbalaei and Cho, 2018; Ko et al., 2018; Yan et al., 2021). Li et al. (2014) first designed a microfluidic device utilizing a gas-liquid interface valve to isolate branches. Migration of human spermatozoa was demonstrated in four preset temperature gradients: 34.0–35.3°C, 35.0–36.3°C, 36.0–37.3°C and 37.0–38.3°C. Despite the on-chip device validating sperm thermotaxis, it was unable to replicate the complex natural selection of FRT. As demonstrated in microfluidics, sperm sorting platforms need to simultaneously combine the molecular characteristics of fertile sperm and their response to external stimuli. In terms of sperm strategy responses, temperature gradients can be used as a new parameter to enhance microfluidic systems along with chemotaxis and rheotaxis. Indeed, fully integrated biomimetic microfluidic devices have recently been developed, enabling the simultaneous assessment and quantification of chemotaxis and thermotaxis (Ko et al., 2018; Yan et al., 2021). The microfluidic chip combining thermotaxis and chemotaxis collected more sperm than when thermotaxis or chemotaxis was applied alone (Ko et al., 2018). It is worth mentioning that no statistical association was observed between thermotaxis and chemotaxis, which may be explained by the fact that different mechanisms drive the two strategy responses.

Sperm selection by thermotaxis contributes to improved ART outcomes. Studies have shown that mouse, human and stallion sperm subpopulations selected by thermotaxis have higher DNA integrity and looser chromatin compared to unselected sperm (Pérez-Cerezales et al., 2018; Ruiz-Díaz et al., 2020). In mice, the use of thermotactically selected sperm significantly increased blastocyst production rates and embryo quality for ICSI (Pérez-Cerezales et al., 2018). However, the actual application of thermotaxis to improve human ART requires support from more extensive clinical studies.

## Conclusions

This article reviews all the current knowledge since the introduction of mammalian sperm thermotaxis, reviews aspects of thermotaxis navigation and sperm temperature sensing mechanisms based on temporal cues, and highlights their potential for use in clinical procedures. Although two other guiding mechanisms, chemotaxis and rheotaxis, are well described, many aspects of thermotaxis remain unknown. Sperm cell function is temperature-dependent, creating difficulties distinguishing between thermotaxis and ambient temperature effects. Furthermore, the molecular mechanisms of thermotaxis are complex and appear to result from an extensive intersection of intracellular signalling pathways. It is now known that at least two classes of opsins and thermoTRPs make up the sperm thermal detection system. However, establishing thermoTRP members as thermotaxis temperature sensors requires further research. The role of ion channels in temperature sensing and sperm cell migration remains unclear. On the other hand, considering that thermotaxis is limited to capacitated sperm, it would be very interesting to investigate the mechanism behind the acquisition of thermotaxis.

## Data availability

No new data were generated or analysed in support of this research.

## Authors' roles

W.X., M.Y. and Y.Y.: conceptualization and initial draft. X.L.: revision. Y.C.: design and supervision, critical revision and suggestions. All authors read and approved the final manuscript.

## Funding

This work was supported by the Traditional Chinese Medicine Scientific and Technological Program of the Jiangxi Province (2021A357 to Y.C.).

## Conflict of interest

The authors declare to have no conflicts of interest.

## References

- Armon L, Eisenbach M. Behavioral mechanism during human sperm chemotaxis: involvement of hyperactivation. *PLoS One* 2011;**6**: e28359.
- Bahat A, Caplan SR, Eisenbach M. Thermotaxis of human sperm cells in extraordinarily shallow temperature gradients over a wide range. *PLoS One* 2012;**7**:e41915.
- Bahat A, Eisenbach M. Sperm thermotaxis. *Mol Cell Endocrinol* 2006;**252**:115–119.
- Bahat A, Eisenbach M. Human sperm thermotaxis is mediated by phospholipase C and inositol trisphosphate receptor  $Ca^{2+}$  channel. *Biol Reprod* 2010;**82**:606–616.
- Bahat A, Eisenbach M, Tur-Kaspa I. Perioovulatory increase in temperature difference within the rabbit oviduct. *Hum Reprod* 2005;**20**: 2118–2121.
- Bahat A, Tur-Kaspa I, Gakamsky A, Giojalas LC, Breitbart H, Eisenbach M. Thermotaxis of mammalian sperm cells: a potential navigation mechanism in the female genital tract. *Nat Med* 2003;**9**: 149–150.
- Barratt CLR, Björndahl L, De Jonge CJ, Lamb DJ, Osorio Martini F, McLachlan R, Oates RD, van der Poel S, St John B, Sigman M et al. The diagnosis of male infertility: an analysis of the evidence to support the development of global WHO guidance-challenges and future research opportunities. *Hum Reprod Update* 2017;**23**: 660–680.
- Bernabo N, Pistilli MG, Mattioli M, Barboni B. Role of TRPV1 channels in boar spermatozoa acquisition of fertilizing ability. *Mol Cell Endocrinol* 2010;**323**:224–231.
- Borowiec A-S, Sion B, Chalmel F, D Rolland A, Lemonnier L, De Clerck T, Bokhobza A, Derouiche S, Dewailly E, Slomianny C et al. Cold/menthol TRPM8 receptors initiate the cold-shock response and protect germ cells from cold-shock-induced oxidation. *FASEB J* 2016;**30**:3155–3170.
- Boryshpolets S, Perez-Cerezales S, Eisenbach M. Behavioral mechanism of human sperm in thermotaxis: a role for hyperactivation. *Hum Reprod* 2015;**30**:884–892.
- Brenker C, Goodwin N, Weyand I, Kashikar ND, Naruse M, Krahling M, Muller A, Kaupp UB, Strunker T. The CatSper channel: a polymodal chemosensor in human sperm. *EMBO J* 2012;**31**: 1654–1665.
- Cao E, Cordero-Morales JF, Liu B, Qin F, Julius D. TRPV1 channels are intrinsically heat sensitive and negatively regulated by phosphoinositide lipids. *Neuron* 2013;**77**:667–679.
- Castellano LE, Treviño CL, Rodríguez D, Serrano CJ, Pacheco J, Tsutsumi V, Felix R, Darszon A. Transient receptor potential (TRPC) channels in human sperm: expression, cellular localization and involvement in the regulation of flagellar motility. *FEBS Lett* 2003;**541**:69–74.
- Chan PJ, Corselli JU, Patton WC, Jacobson JD, King A. Enhanced fertility after heat-induced hyperactivation. *Fertil Steril* 1998;**69**: 118–121.
- Chowdhury S, Jarecki BW, Chanda B. A molecular framework for temperature-dependent gating of ion channels. *Cell* 2014;**158**: 1148–1158.
- Cohen-Dayag A, Ralt D, Tur-Kaspa I, Manor M, Makler A, Dor J, Mashiach S, Eisenbach M. Sequential acquisition of chemotactic responsiveness by human spermatozoa. *Biol Reprod* 1994;**50**: 786–790.
- Cyganekiewicz AI, Maslowska A, Krajewska WM. Molecular basis of taste sense: involvement of GPCR receptors. *Crit Rev Food Sci Nutr* 2014;**54**:771–780.
- Dalesio NM, Barreto Ortiz SF, Pluznick JL, Berkowitz DE. Olfactory, taste, and photo sensory receptors in non-sensory organs: it just makes sense. *Front Physiol* 2018;**9**:1673.
- De Blas GA, Darszon A, Ocampo AY, Serrano CJ, Castellano LE, Hernández-González EO, Chirinos M, Larrea F, Beltrán C, Treviño CL. TRPM8, a versatile channel in human sperm. *PLoS One* 2009;**4**: e6095.

- De Toni L, Garolla A, Menegazzo M, Magagna S, Di Nisio A, Sabovic I, Rocca MS, Scattolini V, Filippi A, Foresta C. Heat sensing receptor TRPV1 is a mediator of thermotaxis in human spermatozoa. *PLoS One* 2016;**11**:e0167622.
- Dhaka A, Viswanath V, Patapoutian A. TRP ion channels and temperature sensation. *Annu Rev Neurosci* 2006;**29**:135–161.
- Eisenbach M, Giojalas LC. Sperm guidance in mammals—an unpaved road to the oocyte. *Nat Rev Mol Cell Biol* 2006;**7**:276–285.
- Fotiadis D, Liang Y, Filipek S, Saperstein DA, Engel A, Palczewski K. Atomic-force microscopy: rhodopsin dimers in native disc membranes. *Nature* 2003;**421**:127–128.
- Franavilla F, Battista N, Barbonetti A, Vassallo MRC, Rapino C, Antonangelo C, Pasquariello N, Catanzaro G, Barboni B, Maccarrone M. Characterization of the endocannabinoid system in human spermatozoa and involvement of transient receptor potential vanilloid I receptor in their fertilizing ability. *Endocrinology* 2009;**150**:4692–4700.
- Fu Y, Yau KW. Phototransduction in mouse rods and cones. *Pflügers Arch* 2007;**454**:805–819.
- Fujinoki M. Progesterone-enhanced sperm hyperactivation through IP3-PKC and PKA signals. *Reprod Med Biol* 2013;**12**:27–33.
- Gervasi MG, Osycka-Salut C, Caballero J, Vazquez-Levin M, Pereyra E, Billi S, Franchi A, Perez-Martinez S. Anandamide capacitates bull spermatozoa through CBI and TRPV1 activation. *PLoS One* 2011;**6**:e16993.
- Hamano K-i, Kawanishi T, Mizuno A, Suzuki M, Takagi Y. Involvement of transient receptor potential vanilloid (TRPV) 4 in mouse sperm thermotaxis. *J Reprod Dev* 2016;**62**:415–422.
- Hino T, Yanagimachi R. Active peristaltic movements and fluid production of the mouse oviduct: their roles in fluid and sperm transport and fertilization. *Biol Reprod* 2019;**101**:40–49.
- Hunter RHF, Nichol R. A preovulatory temperature gradient between the isthmus and ampulla of pig oviducts during the phase of sperm storage. *J Reprod Fertil* 1986;**77**:599–606.
- Jimenez-Gonzalez C, Michelangeli F, Harper CV, Barratt CL, Publicover SJ. Calcium signalling in human spermatozoa: a specialized ‘toolkit’ of channels, transporters and stores. *Hum Reprod Update* 2006;**12**:253–267.
- Kaneko Y, Szallasi A. Transient receptor potential (TRP) channels: a clinical perspective. *Br J Pharmacol* 2014;**171**:2474–2507.
- Kantsler V, Dunkel J, Blayney M, Goldstein RE. Rheotaxis facilitates upstream navigation of mammalian sperm cells. *Elife* 2014;**3**:e02403.
- Karbalaei A, Cho HJ. Microfluidic devices developed for and inspired by thermotaxis and chemotaxis. *Micromachines* 2018;**9**:149.
- Kashio M. Thermosensation involving thermo-TRPs. *Mol Cell Endocrinol* 2021;**520**:111089.
- Kimata T, Sasakura H, Ohnishi N, Nishio N, Mori I. Thermotaxis of *C. elegans* as a model for temperature perception, neural information processing and neural plasticity. *Worm* 2012;**1**:31–41.
- Ko Y-J, Maeng J-H, Hwang SY, Ahn Y. Design, fabrication, and testing of a microfluidic device for thermotaxis and chemotaxis assays of sperm. *SLAS Technol* 2018;**23**:507–515.
- Kumar A, Majhi RK, Swain N, Giri SC, Kar S, Samanta L, Goswami C. TRPV4 is endogenously expressed in vertebrate spermatozoa and regulates intracellular calcium in human sperm. *Biochem Biophys Res Commun* 2016;**473**:781–788.
- Kwon Y, Shim HS, Wang X, Montell C. Control of thermotactic behavior via coupling of a TRP channel to a phospholipase C signaling cascade. *Nat Neurosci* 2008;**11**:871–873.
- Leung NY, Montell C. Unconventional roles of opsins. In Schekman R (ed). *Annu Rev Cell Dev Biol* 2017;**33**:241–264.
- Li A, Luo Y-X, Liu Y, Xu Y-Q, Tian F-B, Wang Y. Hydrodynamic behaviors of self-propelled sperms in confined spaces. *Eng Appl Comput Fluid Mech* 2022;**16**:141–160.
- Li K, Sun P, Wang Y, Gao T, Zheng D, Liu A, Ni Y. Hsp90 interacts with Cdc37, is phosphorylated by PKA/PKC, and regulates Src phosphorylation in human sperm capacitation. *Andrology* 2021;**9**:185–195.
- Li Z, Liu W, Qiu T, Xie L, Chen W, Liu R, Lu Y, Mitchelson K, Wang J, Qiao J et al. The construction of an interfacial valve-based microfluidic chip for thermotaxis evaluation of human sperm. *Biomicrofluidics* 2014;**8**:024102.
- Maccarrone M, Barboni B, Paradisi A, Bernabo N, Gasperi V, Pistilli MG, Fezza F, Lucidi P, Mattioli M. Characterization of the endocannabinoid system in boar spermatozoa and implications for sperm capacitation and acrosome reaction. *J Cell Sci* 2005;**118**:4393–4404.
- Macnab RM, Koshland DE Jr. The gradient-sensing mechanism in bacterial chemotaxis. *Proc Natl Acad Sci USA* 1972;**69**:2509–2512.
- Majhi RK, Kumar A, Giri SC, Goswami C. Differential expression and localization of TRPV channels in the mature sperm of *Anas platyrhynchos*. *Reprod Domest Anim* 2020;**55**:1619–1628.
- Majhi RK, Saha S, Kumar A, Ghosh A, Swain N, Goswami L, Mohapatra P, Maity A, Kumar Sahoo V, Kumar A et al. Expression of temperature-sensitive ion channel TRPM8 in sperm cells correlates with vertebrate evolution. *PeerJ* 2015;**3**:e1310.
- Marin-Briggiler CI, Tezon JG, Miranda PV, Vazquez-Levin MH. Effect of incubating human sperm at room temperature on capacitation-related events. *Fertil Steril* 2002;**77**:252–259.
- Martin-Hidalgo D, Gil MC, Hurtado de Llera A, Perez CJ, Bragado MJ, Garcia-Marin LJ. Boar sperm hyperactivated motility is induced by temperature via an intracellular calcium-dependent pathway. *Reprod Fertil Dev* 2018;**30**:1462–1471.
- Martínez-López P, Treviño CL, de la Vega-Beltrán JL, De Blas G, Monroy E, Beltrán C, Orta G, Gibbs GM, O’Byrne MK, Darszon A. TRPM8 in mouse sperm detects temperature changes and may influence the acrosome reaction. *J Cell Physiol* 2011;**226**:1620–1631.
- Miki K, Clapham DE. Rheotaxis guides mammalian sperm. *Curr Biol* 2013;**23**:443–452.
- Miller VL, Chan PJ, Jacobson JD, Patton WC, King A. A comparison of heat-induced hyperactivation in patients’ sperm after colloid or pentoxifylline wash methods. *Am J Obstet Gynecol* 2001;**184**:1057–1059.
- Minke B, Peters M. Cell biology. Rhodopsin as thermosensor? *Science* 2011;**331**:1272–1273.
- Mizrak SC, van Dissel-Emiliani FM. Transient receptor potential vanilloid receptor-1 confers heat resistance to male germ cells. *Fertil Steril* 2008;**90**:1290–1293.
- Mok M, Abraham D, Grieve RB, Thomas CB. Thermotaxis in third and fourth-stage *Dirofilaria immitis* larvae. *J Helminthol* 1986;**60**:61–64.
- Mondal MA, Takagi Y, Baba SA, Hamano K-I. Involvement of calcium channels and intracellular calcium in bull sperm thermotaxis. *J Reprod Dev* 2017;**63**:143–148.

- Moraes MN, de Assis LVM, Provencio I, Castrucci AML. Opsins outside the eye and the skin: a more complex scenario than originally thought for a classical light sensor. *Cell Tissue Res* 2021;**385**: 519–538.
- Mundt N, Spehr M, Lishko PV. TRPV4 is the temperature-sensitive ion channel of human sperm. *Elife* 2018;**7**:e35853.
- Ni L, Bronk P, Chang EC, Lowell AM, Flam JO, Panzano VC, Theobald DL, Griffith LC, Garrity PA. A gustatory receptor paralogue controls rapid warmth avoidance in *Drosophila*. *Nature* 2013;**500**:580–584.
- Nosrati R, Graham PJ, Zhang B, Riordon J, Lagunov A, Hannam TG, Escobedo C, Jarvi K, Sinton D. Microfluidics for sperm analysis and selection. *Nat Rev Urol* 2017;**14**:707–730.
- Panda S, Nayak SK, Campo B, Walker JR, Hogenesch JB, Jegla T. Illumination of the melanopsin signaling pathway. *Science* 2005; **307**:600–604.
- Patapoutian A, Peier AM, Story GM, Viswanath V. Thermotrp channels and beyond: mechanisms of temperature sensation. *Nat Rev Neurosci* 2003;**4**:529–539.
- Paulick A, Jakovljevic V, Zhang S, Erickstad M, Groisman A, Meir Y, Ryu WS, Wingreen NS, Sourjik V. Mechanism of bidirectional thermotaxis in *Escherichia coli*. *Elife* 2017;**6**:e26607.
- Perez-Cerezales S, Boryshpolets S, Afanzar O, Brandis A, Nevo R, Kiss V, Eisenbach M. Involvement of opsins in mammalian sperm thermotaxis. *Sci Rep* 2015a;**5**:16146.
- Perez-Cerezales S, Boryshpolets S, Eisenbach M. Behavioral mechanisms of mammalian sperm guidance. *Asian J Androl* 2015b;**17**: 628–632.
- Pérez-Cerezales S, Laguna-Barraza R, de Castro AC, Sánchez-Calabuig MJ, Cano-Oliva E, de Castro-Pita FJ, Montoro-Buils L, Pericuesta E, Fernández-González R, Gutiérrez-Adán A. Sperm selection by thermotaxis improves ICSI outcome in mice. *Sci Rep* 2018;**8**:2902.
- Rodríguez-Gil JE. Photostimulation and thermotaxis of sperm: overview and practical implications in porcine reproduction. *Theriogenology* 2019;**137**:8–14.
- Roy D, Levi K, Kiss V, Nevo R, Eisenbach M. Rhodopsin and melanopsin coexist in mammalian sperm cells and activate different signaling pathways for thermotaxis. *Sci Rep* 2020;**10**:112.
- Ruiz-Díaz S, Oseguera-López I, De La Cuesta-Díaz D, García-López B, Serres C, Sanchez-Calabuig MJ, Gutiérrez-Adán A, Perez-Cerezales S. The presence of D-penicillamine during the *in vitro* capacitation of stallion spermatozoa prolongs hyperactive-like motility and allows for sperm selection by thermotaxis. *Animals (Basel)* 2020;**10**:1467.
- Schiffer C, Rieger S, Brenker C, Young S, Hamzeh H, Wachten D, Tüttelmann F, Röpke A, Kaupp UB, Wang T et al. Rotational motion and rheotaxis of human sperm do not require functional CatSper channels and transmembrane Ca(2+) signaling. *EMBO J* 2020;**39**:e102363.
- Shen WL, Kwon Y, Adegbola AA, Luo J, Chess A, Montell C. Function of rhodopsin in temperature discrimination in *Drosophila*. *Science* 2011;**331**:1333–1336.
- Sokabe T, Chen HC, Luo J, Montell C. A switch in thermal preference in *Drosophila* larvae depends on multiple rhodopsins. *Cell Rep* 2016;**17**:336–344.
- Stock C, Ludwig FT, Hanley PJ, Schwab A. Roles of ion transport in control of cell motility. *Compr Physiol* 2013;**3**:59–119.
- Suarez SS. Mammalian sperm interactions with the female reproductive tract. *Cell Tissue Res* 2016;**363**:185–194.
- Suarez SS, Pacey AA. Sperm transport in the female reproductive tract. *Hum Reprod Update* 2006;**12**:23–37.
- Sun F, Bahat A, Gakamsky A, Girsh E, Katz N, Giojalas LC, Turkaspa I, Eisenbach M. Human sperm chemotaxis: both the oocyte and its surrounding cumulus cells secrete sperm chemoattractants. *Hum Reprod* 2005;**20**:761–767.
- Teves ME, Barbano F, Guidobaldi HA, Sanchez R, Miska W, Giojalas LC. Progesterone at the picomolar range is a chemoattractant for mammalian spermatozoa. *Fertil Steril* 2006;**86**:745–749.
- Vandewauw I, De Clercq K, Mulier M, Held K, Pinto S, Van Ranst N, Segal A, Voet T, Vennekens R, Zimmermann K et al. A TRP channel trio mediates acute noxious heat sensing. *Nature* 2018;**555**: 662–666.
- Vay L, Gu CJ, McNaughton PA. The thermo-TRP ion channel family: properties and therapeutic implications. *Br J Pharmacol* 2012;**165**: 787–801.
- Wachten D, Jikeli JF, Kaupp UB. Sperm sensory signaling. *Cold Spring Harb Perspect Biol* 2017;**9**:a028225.
- Wang H, Cheng X, Tian J, Xiao Y, Tian T, Xu F, Hong X, Zhu MX. TRPC channels: structure, function, regulation and recent advances in small molecular probes. *Pharmacol Ther* 2020;**209**:107497.
- Waning J, Vriens J, Owsianik G, Stuwe L, Mally S, Fabian A, Frippliat C, Nilius B, Schwab A. A novel function of capsaicin-sensitive TRPV1 channels: involvement in cell migration. *Cell Calcium* 2007;**42**:17–25.
- Xiao W, Chen Y. TRPV1 in male reproductive system: focus on sperm function. *Mol Cell Biochem* 2022. doi: [10.1007/s11010-022-04469-2](https://doi.org/10.1007/s11010-022-04469-2).
- Yan Y, Zhang B, Fu Q, Wu J, Liu R. A fully integrated biomimetic microfluidic device for evaluation of sperm response to thermotaxis and chemotaxis. *Lab Chip* 2021;**21**:310–318.
- Zaferani M, Javi F, Mokhtare A, Li P, Abbaspourrad A. Rolling controls sperm navigation in response to the dynamic rheological properties of the environment. *Elife* 2021a;**10**:e68693.
- Zaferani M, Suarez SS, Abbaspourrad A. Mammalian sperm hyperactivation regulates navigation via physical boundaries and promotes pseudo-chemotaxis. *Proc Natl Acad Sci USA* 2021b; **118**:e2107500118.
